# Supplementary material for: Effect of skill drills on neonatal ventilation performance in a simulated setting- observation study in Nepal
Source: Springer Nature journal article supplement (doi:10.1186/s12887-019-1723-0), 2019-10-28

# Quality Improvement of Perinatal Care (Quality Improvement Tools)

---

Name of the Hospital:

---

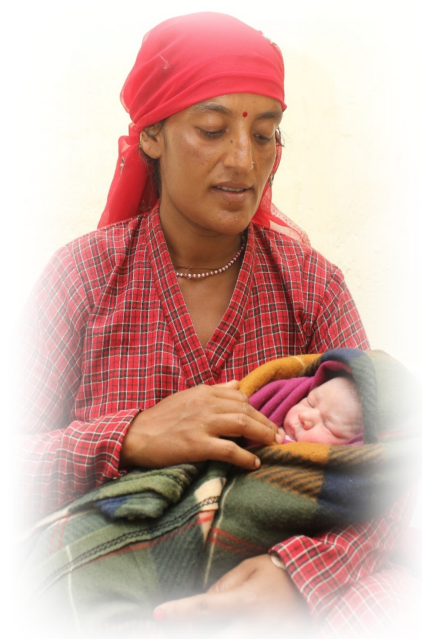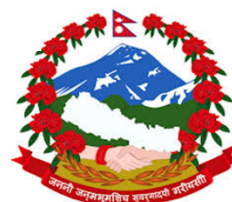

Government of Nepal  
Ministry of Health  
Department of Health Services  
Child Health Division

# Table of Contents

| SN. | Contents                                                                               | Page No. |
|-----|----------------------------------------------------------------------------------------|----------|
| 1.  | Tool for hospital assessment of readiness and availability of perinatal care services  | 1        |
| 2.  | Perinatal Care Progress Boards                                                         | 18       |
|     | 2.1. Perinatal Care Progress Board in delivery room                                    | 18       |
|     | 2.2. Perinatal Care Progress Board in KMC unit                                         | 20       |
|     | 2.3. Perinatal Care Progress Board in SNCU/NICU                                        | 22       |
|     | 2.4. Perinatal Care Progress Board in Matron's room                                    | 24       |
|     | 2.5. Perinatal Care Progress Board in Medical Superintendent's room                    | 26       |
| 3.  | Self-assessment checklist                                                              | 30       |
|     | 3.1. Self-assessment checklist on Bag and mask skill check on the mannequin            | 30       |
|     | 3.2. Self-assessment checklist for preparation for resuscitation before every delivery | 31       |
|     | 3.3. Self-assessment checklist for babies requiring routine immediate newborn care     | 32       |
|     | 3.4. Self-assessment checklist for babies requiring ventilation                        | 33       |
|     | 3.5. Self-assessment checklist for babies who were provided Kangaroo Mother Care       | 34       |
|     | 3.6. Self-assessment checklist for babies who were managed for neonatal infection      | 35       |

# 1. Tool for Hospital Assessment of Readiness and Availability of Perinatal Care Services

The purpose of this assessment tool is to evaluate the current capacity of the health facility in providing delivery and newborn care services. This survey elicits information on the status of services, human resources, infrastructure and available equipment. The objective is to summarize the existing resources, identify gaps to inform newborn corner, assist in planning the stabilization unit or special newborn care unit.

The assessment tool consists of six main sections: **general, availability of service, human resources, infrastructure, equipment and supplies, health information systems and governance and financing**. Each section should be filled in by the Facilitator(s) with the help of Mentor using direct observation, interview of relevant personnel and/or register and schedule checking. The physical observation should be done by both the Mentor and the Facilitator(s) to ensure validity of results. The correct results are to be circled or appropriate numbers and details entered.

| PROFORMA FOR FACILITY ASSESSMENT               |                                 |                                                                                                                                                                                                                                                                                                                                                                                                                                                                          |         |  |  |  |  |  |  |  |  |
|------------------------------------------------|---------------------------------|--------------------------------------------------------------------------------------------------------------------------------------------------------------------------------------------------------------------------------------------------------------------------------------------------------------------------------------------------------------------------------------------------------------------------------------------------------------------------|---------|--|--|--|--|--|--|--|--|
| SECTION 1: FACILITY IDENTIFICATION INFORMATION |                                 |                                                                                                                                                                                                                                                                                                                                                                                                                                                                          |         |  |  |  |  |  |  |  |  |
| SN.                                            | Question                        | Response                                                                                                                                                                                                                                                                                                                                                                                                                                                                 | Remarks |  |  |  |  |  |  |  |  |
| 101.                                           | Date of Assessment (dd/mm/yyyy) | <table border="1" style="display: inline-table; border-collapse: collapse;"> <tr> <td style="width: 20px; height: 20px;"></td> </tr> </table> |         |  |  |  |  |  |  |  |  |
|                                                |                                 |                                                                                                                                                                                                                                                                                                                                                                                                                                                                          |         |  |  |  |  |  |  |  |  |
| 102.                                           | Name of District                | .....                                                                                                                                                                                                                                                                                                                                                                                                                                                                    |         |  |  |  |  |  |  |  |  |
| 103.                                           | Type of Hospital                | Regional Hospital .....1<br>Sub-Regional hospital .....2<br>Zonal Hospital .....3<br>District Hospital .....4<br>Other (specify) .....                                                                                                                                                                                                                                                                                                                                   |         |  |  |  |  |  |  |  |  |
| 104.                                           | Name of Hospital                | .....                                                                                                                                                                                                                                                                                                                                                                                                                                                                    |         |  |  |  |  |  |  |  |  |

## SECTION 2: AVAILABILITY OF SERVICES (observe/check)

Please circle the correct response and fill in the missing information. In addition, please state the source of the information that helped inform the response and whether it is direct observation or an interview with relevant personnel. Annex A contains specific definitions of the services provided for clarification.

| SN.                         | Question                                        | Response   |           | Remarks |
|-----------------------------|-------------------------------------------------|------------|-----------|---------|
|                             |                                                 | YES        | NO        |         |
| <b>Delivery of Services</b> |                                                 | <b>YES</b> | <b>NO</b> |         |
| 201.                        | Is there a 24-hour delivery service?            | 1          | 2         |         |
| 202.                        | <b>List of Newborn Care Services</b>            |            |           |         |
| a)                          | Immediate newborn care services                 | 1          | 2         |         |
| b)                          | Resuscitation services                          | 1          | 2         |         |
| c)                          | Kangaroo Mother Care (KMC)                      | 1          | 2         |         |
| d)                          | Breastfeeding support                           | 1          | 2         |         |
| e)                          | Sick Newborn Care Services                      | 1          | 2         |         |
| f)                          | Others (specify).....                           | 1          | 2         |         |
| 203.                        | <b>List of Delivery Services</b>                |            |           |         |
| a)                          | Normal deliveries                               | 1          | 2         |         |
| b)                          | Assisted (Forceps delivery/Vacuum delivery)     | 1          | 2         |         |
| c)                          | Manual removal of placenta                      | 1          | 2         |         |
| d)                          | Administration of placenta oxytocics            | 1          | 2         |         |
| e)                          | Administration of magnesium sulphate injections | 1          | 2         |         |
| f)                          | Management of PPH                               | 1          | 2         |         |
| g)                          | Management of other complications               | 1          | 2         |         |
| h)                          | Caesarean section (CS)                          | 1          | 2         |         |

| 204. | Referral Services                                                                                  |                                                                                 |   |                  |
|------|----------------------------------------------------------------------------------------------------|---------------------------------------------------------------------------------|---|------------------|
| a)   | Provision of referrals                                                                             | 1                                                                               | 2 | If No, go to e)  |
| b)   | If yes, name of the referral facility                                                              | .....                                                                           |   |                  |
| c)   | What kind of information about the patient is given to the referring hospital? (multiple choice)   | Written report.....1<br>Over phone.....2<br>None.....3<br>Others (specify)..... |   |                  |
| d)   | How would you describe the referral information given?                                             | .....                                                                           |   |                  |
| e)   | Are patients referred to this hospital?                                                            | 1                                                                               | 2 | If No, go to 205 |
| f)   | If Yes, name of the facilities that refer patients? (hospitals/health facilities)                  | .....                                                                           |   |                  |
| g)   | Is there a referral document available for patients that are referred to this hospital?            | 1                                                                               | 2 | If No, go to 205 |
| h)   | If Yes, what kind of documentation is available? (if it differs per patient, describe all methods) | .....                                                                           |   |                  |
| i)   | How would you describe the overall referral documentation? (comprehensive or limited)              | .....                                                                           |   |                  |

| 205. | Staffing of services                                                                                                                                                    | YES   | NO |                 |
|------|-------------------------------------------------------------------------------------------------------------------------------------------------------------------------|-------|----|-----------------|
| a)   | Is the duty roster (24-hour clock) prepared? (check for availability)                                                                                                   | 1     | 2  | If No, go to c) |
| b)   | If Yes, are the staff available on their designated shifts?                                                                                                             | 1     | 2  |                 |
| c)   | Is there a skilled person in conducting deliveries present at the hospital or on call round the clock, including weekends and public holidays to provide delivery care? | 1     | 2  |                 |
| d)   | Who responds first to complicated deliveries at the hospital? (list all the professionals involved)                                                                     | ..... |    |                 |
| e)   | Is an Obstetrician available to respond to complicated deliveries 24 hours a day?                                                                                       | 1     | 2  |                 |
| f)   | Is a Pediatrician available to respond to complicated deliveries 24 hours a day?                                                                                        | 1     | 2  |                 |

| 206. | Services available in the hospital     | YES | NO |  |
|------|----------------------------------------|-----|----|--|
| a)   | Antenatal Care (ANC) services          | 1   | 2  |  |
| b)   | Postnatal Care (PNC) services          | 1   | 2  |  |
| c)   | Immunization services                  | 1   | 2  |  |
| d)   | Family Planning (FP) services          | 1   | 2  |  |
| e)   | Reproductive Health services (RTI/STI) | 1   | 2  |  |
| f)   | Laboratory services (24-hour)          | 1   | 2  |  |
| g)   | Blood transfusion services             | 1   | 2  |  |

### SECTION 3: HUMAN RESOURCES

| 301. | DESIGNATION                    | Sanctioned | Fulfilled | Remarks |
|------|--------------------------------|------------|-----------|---------|
| a)   | Medical Superintendent         |            |           |         |
| b)   | Physician                      |            |           |         |
| c)   | Neonatologist                  |            |           |         |
| d)   | Pediatrician                   |            |           |         |
| e)   | Gynecologist/ Obstetrician     |            |           |         |
| f)   | Maternity Ward                 |            |           |         |
| g)   | Matron                         |            |           |         |
| h)   | Medical Officer                |            |           |         |
| i)   | Ward In-charge                 |            |           |         |
| j)   | Staff Nurse                    |            |           |         |
| k)   | Auxiliary Nurse Midwives (ANM) |            |           |         |
| l)   | Health Assistants (HA)         |            |           |         |
| m)   | Support staffs                 |            |           |         |
| n)   | SNCU/NICU                      |            |           |         |
| o)   | Neonatologist                  |            |           |         |
| p)   | Pediatrician                   |            |           |         |
| q)   | Ward In-charge                 |            |           |         |
| r)   | Staff Nurse                    |            |           |         |
| s)   | ANM                            |            |           |         |
| t)   | Support staffs                 |            |           |         |
| u)   | Others (specify).....          |            |           |         |

| 302.         | TRAINING                     |                 |                 |  |
|--------------|------------------------------|-----------------|-----------------|--|
| 303.         | <b>SBA Training</b>          | <b>ELIGIBLE</b> | <b>RECEIVED</b> |  |
| a)           | Matron                       |                 |                 |  |
| b)           | Medical Officer              |                 |                 |  |
| c)           | Nursing Supervisor/In-charge |                 |                 |  |
| d)           | Staff Nurse                  |                 |                 |  |
| e)           | ANM                          |                 |                 |  |
| <b>TOTAL</b> |                              |                 |                 |  |
| 304.         | <b>IMNCI Training</b>        | <b>ELIGIBLE</b> | <b>RECEIVED</b> |  |
| a)           | Medical Superintendent       |                 |                 |  |
| b)           | Physician                    |                 |                 |  |
| c)           | Neonatologist/Pediatrician   |                 |                 |  |
| d)           | Gynecologist/Obstetrician    |                 |                 |  |
| e)           | Matron                       |                 |                 |  |
| f)           | Nursing Supervisor/In-charge |                 |                 |  |
| g)           | Staff Nurses                 |                 |                 |  |
| h)           | HA                           |                 |                 |  |
| i)           | ANM                          |                 |                 |  |
| j)           | Others (specify).....        |                 |                 |  |
| <b>TOTAL</b> |                              |                 |                 |  |



| 305.         | Level II Newborn Care Training | ELIGIBLE | RECEIVED |  |
|--------------|--------------------------------|----------|----------|--|
| a)           | Medical Superintendent         |          |          |  |
| b)           | Physician                      |          |          |  |
| c)           | Neonatologist/Pediatrician     |          |          |  |
| d)           | Gynecologist/Obstetrician      |          |          |  |
| e)           | Matron                         |          |          |  |
| f)           | Nursing Supervisor/In-charge   |          |          |  |
| g)           | Staff Nurses                   |          |          |  |
| h)           | HA                             |          |          |  |
| i)           | ANM                            |          |          |  |
| j)           | Others (specify).....          |          |          |  |
| <b>TOTAL</b> |                                |          |          |  |

## SECTION 4: INFRASTRUCTURE, EQUIPMENT AND RECORDS

The answers to the following questions need to be physically observed by the Facilitator(s) and verified by the Mentor. If the item cannot be observed or the information cannot be gained through observation, the source of the information needs to be stated. This includes the position and relevance of the person informing, website or other informing source.

| SN.         | Question                                                                                    | Response |    |           | Remarks          |
|-------------|---------------------------------------------------------------------------------------------|----------|----|-----------|------------------|
| <b>401.</b> | <b>POWER SUPPLY</b>                                                                         |          |    |           |                  |
| a)          | Is there an electric supply?                                                                | YES      | NO | IRREGULAR | If No, go to 402 |
|             |                                                                                             | 1        | 2  | 3         |                  |
| b)          | If Yes, check if the electricity is running                                                 | YES      |    | NO        |                  |
|             |                                                                                             | 1        | 2  |           |                  |
| c)          | Is there lighting in the labor room?                                                        | YES      |    | NO        | If No, go to e)  |
|             |                                                                                             | 1        | 2  |           |                  |
| d)          | If Yes, how is the lighting in the labor room?                                              | Strong   |    | Weak      |                  |
|             |                                                                                             | 1        | 2  |           |                  |
| e)          | Is there lighting in the SNCU/NICU?                                                         | YES      |    | NO        | If No, go to g)  |
|             |                                                                                             | 1        | 2  |           |                  |
| f)          | If Yes, how is the lighting in the SNCU/NICU?                                               | Strong   |    | Weak      |                  |
|             |                                                                                             | 1        | 2  |           |                  |
| g)          | Does the hospital have a backup or standby generator for electricity supply?                | YES      |    | NO        | If No, go to 402 |
|             |                                                                                             | 1        | 2  |           |                  |
| h)          | If Yes, is the backup or generator functioning? (Accept reported response and state source) | 1        | 2  |           | If No, go to 402 |
| i)          | If Yes, is fuel available to run the generator? (Accept reported response and state source) | 1        | 2  |           |                  |

| 402. |                                                                    | WATER                                                                                                                                                                  |         |                  |
|------|--------------------------------------------------------------------|------------------------------------------------------------------------------------------------------------------------------------------------------------------------|---------|------------------|
| a)   | What is the main source of water for the hospital?                 | Piped water.....1<br>Tube well or borehole.....2<br>Dug well.....3<br>Tank water supply.....4<br>Others (specify).....                                                 |         |                  |
| b)   | Is the water safe to drink?                                        | YES<br>1                                                                                                                                                               | NO<br>2 | If No, go to 403 |
| c)   | If Yes, what do you do to make it safe to drink?                   | Boiling.....1<br>Bleaching/chlorination.....2<br>Strain through a cloth.....3<br>Water filter.....4<br>Sedimentation.....5<br>RO Filter.....6<br>Others (specify)..... |         |                  |
| d)   | Is the water outlet (water tap) within 500 meters of the hospital? | YES<br>1                                                                                                                                                               | NO<br>2 |                  |
| e)   | Is the water supply working today?                                 | 1                                                                                                                                                                      | 2       |                  |

| 403. |                                                                                                                             | REFERRAL SYSTEM |         |                  |
|------|-----------------------------------------------------------------------------------------------------------------------------|-----------------|---------|------------------|
| a)   | Does the hospital have a functional ambulance or other vehicle on-site for referrals?                                       | YES<br>1        | NO<br>2 | If No, go to 404 |
| b)   | Does the ambulance have fuel in it right now? (check/observe)                                                               | 1               | 2       |                  |
| c)   | Does the hospital have a mechanism or system to make phone calls that is available all the time? (mobile phones, landlines) | 1               | 2       | If No, go to 404 |
| d)   | If Yes, is it available on-site? (check/observe)                                                                            | 1               | 2       |                  |

| 404. | INFRASTRUCTURE: CAPACITY AND SPACE (check/observe)                           |                      |           |                            |
|------|------------------------------------------------------------------------------|----------------------|-----------|----------------------------|
| 405. | Number of beds in maternity ward                                             | <input type="text"/> |           |                            |
| 406. | Number of beds in labor room                                                 | <input type="text"/> |           |                            |
| 407. | Number of beds in postnatal ward                                             | <input type="text"/> |           |                            |
| 408. | Number of beds only for neonates in hospital                                 | <input type="text"/> |           |                            |
| 409. | Number of beds in SNCU/NICU                                                  | <input type="text"/> |           |                            |
| 410. | <b>Does the facility have a designated area for the following functions?</b> | <b>YES</b>           | <b>NO</b> | <b>If Yes, no. of beds</b> |
| a)   | Labor Room                                                                   | 1                    | 2         |                            |
| b)   | Operating Theatre (OT)                                                       | 1                    | 2         |                            |
| c)   | Postnatal Ward                                                               | 1                    | 2         |                            |
| d)   | Newborn Corner                                                               | 1                    | 2         |                            |
| e)   | KMC Corner/Unit                                                              | 1                    | 2         |                            |
| f)   | Special Care Unit (SNCU/NICU)                                                | 1                    | 2         |                            |
| g)   | Breastfeeding corner (for patients and staffs both)                          | 1                    | 2         |                            |
| h)   | Handwashing space (labor ward)                                               | 1                    | 2         |                            |
| i)   | Handwashing space (SNCU/NICU)                                                | 1                    | 2         |                            |
| j)   | Boiling and autoclaving                                                      | 1                    | 2         |                            |
| k)   | Laundry                                                                      | 1                    | 2         |                            |

|             |                                                                                                                         |                                                                                                                     |    |  |  |
|-------------|-------------------------------------------------------------------------------------------------------------------------|---------------------------------------------------------------------------------------------------------------------|----|--|--|
| l)          | Clean utility room (for storing used and contaminated materials)                                                        | 1                                                                                                                   | 2  |  |  |
| m)          | Soiled utility room (for storing used and contaminated materials)                                                       | 1                                                                                                                   | 2  |  |  |
| n)          | Store                                                                                                                   | 1                                                                                                                   | 2  |  |  |
| o)          | Laboratory Room                                                                                                         | 1                                                                                                                   | 2  |  |  |
| p)          | Doctor's Room                                                                                                           | 1                                                                                                                   | 2  |  |  |
| q)          | Nurses Room                                                                                                             | 1                                                                                                                   | 2  |  |  |
| 411.        | In the last 3 months, have any in-patients in the maternity ward shared beds at any time before or after delivery?      | YES                                                                                                                 | NO |  |  |
|             |                                                                                                                         | 1                                                                                                                   | 2  |  |  |
| 412.        | In the last 3 months, have any in-patients in the maternity ward slept on the floor?                                    | YES                                                                                                                 | NO |  |  |
|             |                                                                                                                         | 1                                                                                                                   | 2  |  |  |
| 413.        | In the last 3 months, have the maternity patients delivered on the floor in a corridor or bathroom due to lack of beds? | YES                                                                                                                 | NO |  |  |
|             |                                                                                                                         | 1                                                                                                                   | 2  |  |  |
| 414.        | Right now, are there any empty beds? (Maternity Ward only)                                                              | YES                                                                                                                 | NO |  |  |
|             |                                                                                                                         | 1                                                                                                                   | 2  |  |  |
| <b>415.</b> | <b>LOCATION OF EQUIPMENT/SUPPLIES (check/observe)</b>                                                                   |                                                                                                                     |    |  |  |
| a)          | Is the delivery set located in the delivery ward?                                                                       | 1                                                                                                                   | 2  |  |  |
| b)          | Where is the resuscitation equipment located? (multiple response)                                                       | Admission ward..... 1<br>Labor ward.....2<br>PNC ward.....3<br>OT.....4<br>SNCU/NICU.....5<br>Others (specify)..... |    |  |  |

## EQUIPMENT AND SUPPLIES

The purpose of this listing is to have an inventory of all available equipment at the facility. Availability refers to whether the item is in fact present and can be physically observed. The functionality refers to the condition of the supplies, whether the item is in working order. Function means it is in working condition and packaged implies it is sealed and unopened.

*Available---1; Not available---2; Functional---3; Non-functional---4; Packaged---5; Unable to determine ---6*

| SN.         | Monitoring Equipment                  | Availability | Functionality | Remarks |
|-------------|---------------------------------------|--------------|---------------|---------|
| a)          | Stethoscope with neonatal chest piece | 1 2          | 3 4 5 6       |         |
| b)          | Non-invasive BP monitors              | 1 2          | 3 4 5 6       |         |
| c)          | Heart rate/apnea monitor              | 1 2          | 3 4 5 6       |         |
| d)          | Pulse oximeter                        | 1 2          | 3 4 5 6       |         |
| e)          | Low reading clinical thermometers     | 1 2          | 3 4 5 6       |         |
| f)          | Room thermometers                     | 1 2          | 3 4 5 6       |         |
| g)          | Electronic baby weighing scale        | 1 2          | 3 4 5 6       |         |
| h)          | Mechanical baby weighing scale        | 1 2          | 3 4 5 6       |         |
| <b>416.</b> | <b>Equipment for Management</b>       |              |               |         |
| a)          | Radiant warmer                        | 1 2          | 3 4 5 6       |         |
| b)          | Phototherapy unit                     | 1 2          | 3 4 5 6       |         |
| c)          | CPAP                                  | 1 2          | 3 4 5 6       |         |
| d)          | Ventilator                            | 1 2          | 3 4 5 6       |         |
| e)          | Glucometer                            | 1 2          | 3 4 5 6       |         |
| f)          | Others<br>(specify).....              | 1 2          | 3 4 5 6       |         |

|             |                                        |   |   |         |
|-------------|----------------------------------------|---|---|---------|
| <b>417.</b> | <b>Resuscitation Equipment</b>         |   |   |         |
| a)          | Self-inflating bags                    | 1 | 2 | 3 4 5 6 |
| b)          | Foot operated suction pumps/mucus trap | 1 | 2 | 3 4 5 6 |
| c)          | Penguin suction                        | 1 | 2 | 3 4 5 6 |
| d)          | Bag and Mask                           | 1 | 2 | 3 4 5 6 |
| <b>418.</b> | <b>Oxygenation Facility</b>            |   |   |         |
| a)          | Centralized                            | 1 | 2 | 3 4 5 6 |
| b)          | Oxygen cylinder                        | 1 | 2 | 3 4 5 6 |
| c)          | Concentrator                           | 1 | 2 | 3 4 5 6 |
| d)          | Head boxes for delivery of oxygen      | 1 | 2 | 3 4 5 6 |
| <b>419.</b> | <b>Equipment for Investigation</b>     |   |   |         |
| a)          | Micro-hematocrit (Hemoglobinometer)    | 1 | 2 | 3 4 5 6 |
| b)          | Dextrometer                            | 1 | 2 | 3 4 5 6 |
| c)          | Microscope                             | 1 | 2 | 3 4 5 6 |
| d)          | Total Serum Bilirubin                  | 1 | 2 | 3 4 5 6 |
| e)          | HbsAg                                  | 1 | 2 | 3 4 5 6 |
| f)          | HIV                                    | 1 | 2 | 3 4 5 6 |
| g)          | Blood Grouping                         | 1 | 2 | 3 4 5 6 |
| h)          | Total Blood Count                      | 1 | 2 | 3 4 5 6 |
| i)          | C-Reactive Protein (C-RP)              | 1 | 2 | 3 4 5 6 |
| j)          | Blood Glucose                          | 1 | 2 | 3 4 5 6 |

|             |                                  |   |   |   |   |   |   |  |
|-------------|----------------------------------|---|---|---|---|---|---|--|
| k)          | Lumbar puncture                  | 1 | 2 | 3 | 4 | 5 | 6 |  |
| l)          | Renal Function Test (RFT)        | 1 | 2 | 3 | 4 | 5 | 6 |  |
| m)          | Blood Culture                    | 1 | 2 | 3 | 4 | 5 | 6 |  |
| n)          | Urine Culture                    | 1 | 2 | 3 | 4 | 5 | 6 |  |
| o)          | CSF Culture                      | 1 | 2 | 3 | 4 | 5 | 6 |  |
| p)          | X-Ray                            | 1 | 2 | 3 | 4 | 5 | 6 |  |
| <b>420.</b> | <b>General Equipment</b>         |   |   |   |   |   |   |  |
| a)          | Generator                        | 1 | 2 | 3 | 4 | 5 | 6 |  |
| b)          | Invertors                        | 1 | 2 | 3 | 4 | 5 | 6 |  |
| c)          | Washing Machine                  | 1 | 2 | 3 | 4 | 5 | 6 |  |
| d)          | Refrigerator                     | 1 | 2 | 3 | 4 | 5 | 6 |  |
| e)          | Computer                         | 1 | 2 | 3 | 4 | 5 | 6 |  |
| f)          | Wall clock (with 'seconds' hand) | 1 | 2 | 3 | 4 | 5 | 6 |  |
| g)          | Surgical instruments             | 1 | 2 | 3 | 4 | 5 | 6 |  |
| h)          | Spot lamps                       | 1 | 2 | 3 | 4 | 5 | 6 |  |
| i)          | Air Conditioner                  | 1 | 2 | 3 | 4 | 5 | 6 |  |
| j)          | Autoclave equipment              | 1 | 2 | 3 | 4 | 5 | 6 |  |



| SECTION 5: HEALTH INFORMATION SYSTEMS |                                                                                                      |                                                                                                                         |    |                  |
|---------------------------------------|------------------------------------------------------------------------------------------------------|-------------------------------------------------------------------------------------------------------------------------|----|------------------|
| SN.                                   | Question                                                                                             | Response                                                                                                                |    | Remarks          |
|                                       |                                                                                                      | YES                                                                                                                     | NO |                  |
| 501.                                  | <b>INPUT</b>                                                                                         |                                                                                                                         |    |                  |
| 502.                                  | Does the facility carry out audits or case reviews or maternal deaths on a routine basis?            | 1                                                                                                                       | 2  |                  |
| 503.                                  | Does the facility carry out audits or case reviews or newborn deaths/stillbirths on a routine basis? | 1                                                                                                                       | 2  |                  |
| 504.                                  | Does this hospital have a system in place to regularly collect MNH service data?                     | 1                                                                                                                       | 2  |                  |
| 505.                                  | <b>OUTPUT</b>                                                                                        |                                                                                                                         |    |                  |
| 506.                                  | Does this facility regularly complete any reports containing MNH services?                           | 1                                                                                                                       | 2  | If No, go to 508 |
| 507.                                  | If Yes, who does it?                                                                                 | .....                                                                                                                   |    |                  |
| 508.                                  | What is the main source of the data for the reports?                                                 | .....                                                                                                                   |    |                  |
| 509.                                  | How frequently are these reports compiled?                                                           | .....                                                                                                                   |    |                  |
| 510.                                  | <b>DISSEMINATION</b>                                                                                 |                                                                                                                         |    |                  |
| 511.                                  | Who has the access to the compiled data? (multiple choice)                                           | All staffs.....1<br>Decision makers..... 2<br>Public.....3<br>NGOs/INGOs.....4<br>No one.....5<br>Others (specify)..... |    |                  |

|      |                                                                                                                |       |   |                        |
|------|----------------------------------------------------------------------------------------------------------------|-------|---|------------------------|
| 512. | Is the data displayed                                                                                          | 1     | 2 | If No, go to Section 6 |
| 513. | If Yes, where is it displayed?                                                                                 | ..... |   |                        |
| 514. | In what format is the data presented?<br>(aggregated/graphs)<br>Confirm with the medical recorder/stat officer | ..... |   |                        |

**SECTION 6: GOVERNANCE AND FINANCING**

| SN.  | Question                                          | Response                                  |    | Remarks          |
|------|---------------------------------------------------|-------------------------------------------|----|------------------|
| 601. | Is there a hospital governance committee?         | YES                                       | NO | If No, go to 605 |
|      |                                                   | 1                                         | 2  |                  |
| 602. | If Yes, how frequently do they meet? (times/year) | <input type="text"/> <input type="text"/> |    |                  |
| 603. | What is the number of work/action plans created?  | <input type="text"/> <input type="text"/> |    |                  |
| 604. | How many work/action plans have been reviewed?    | <input type="text"/> <input type="text"/> |    |                  |
| 605. | Is there a hospital QI/MPDR committee?            | YES                                       | NO | If No, go to 609 |
|      |                                                   | 1                                         | 2  |                  |
| 606. | If Yes, how frequently do they meet? (times/year) | <input type="text"/> <input type="text"/> |    |                  |
| 607. | What is the number of work/action plans created?  | <input type="text"/> <input type="text"/> |    |                  |
| 608. | How many work/action plans have been reviewed?    | <input type="text"/> <input type="text"/> |    |                  |

|      |                                                                                                                                  |                                                                                                                                            |  |
|------|----------------------------------------------------------------------------------------------------------------------------------|--------------------------------------------------------------------------------------------------------------------------------------------|--|
| 609. | How is the hospital financed?                                                                                                    | Government of Nepal.....1<br>Hospital Development<br>Committee.....2<br>NGOs/INGOs.....3<br>Private funders.....4<br>Others (specify)..... |  |
| 610. | What is the main source of<br>revenue generated? (i.e.<br>laboratory tests, admission<br>fee, etc.)<br>(mention all the sources) | .....                                                                                                                                      |  |

Facilitator's Name & Signature.....

Mentor's Name & Signature.....

Date.....

## 2.1. Perinatal Care Progress Board in Delivery Room

| Indicators                                                               | Month: _____ Week: _____ |     |     |     |     |     |     | Weekly compilation<br>(previous week) |
|--------------------------------------------------------------------------|--------------------------|-----|-----|-----|-----|-----|-----|---------------------------------------|
|                                                                          | Days                     |     |     |     |     |     |     |                                       |
|                                                                          | Sun                      | Mon | Tue | Wed | Thu | Fri | Sat |                                       |
| Total birth                                                              |                          |     |     |     |     |     |     |                                       |
| Total Still birth                                                        |                          |     |     |     |     |     |     |                                       |
| Number of babies with Low Birth Weight                                   |                          |     |     |     |     |     |     |                                       |
| Number of babies who did not cry at birth                                |                          |     |     |     |     |     |     |                                       |
| Number of babies who are successfully resuscitated with bag & mask       |                          |     |     |     |     |     |     |                                       |
| Number of babies who were resuscitated with bag & mask within 1 minute   |                          |     |     |     |     |     |     |                                       |
| Number of babies who were initiated breastfeeding within 1 hour of birth |                          |     |     |     |     |     |     |                                       |

## Instructions for use

1. This progress board will be placed visibly in the delivery room.
2. This progress should be maintained on a daily basis by the facilitator or a person assigned by the facilitator. The number in the row for respective indicator should be filled in the morning hours of following day. For example, the facilitator/ health worker will fill the number of respective indicator of Sunday in the morning of Monday.
3. At the end of the week the facilitator should compile the numbers and note in a diary.
4. After completion of the week, the numbers should be erased and the process should be started for the next week.
5. Description of indicators

|                                                                          |                                                                                        |
|--------------------------------------------------------------------------|----------------------------------------------------------------------------------------|
| Total birth                                                              | Write the total number of births (live and still birth in a day).                      |
| Total Still birth                                                        | Write the total number of still births.                                                |
| Number of babies with Low Birth Weight                                   | Write the total number of babies who were born with low birth weight.                  |
| Number of babies who did not cry at birth                                | Write the total number of babies who did not cry at birth                              |
| Number of babies who are successfully resuscitated with bag & mask       | Write the total number of babies who were successfully resuscitated with bag and mask  |
| Number of babies who were resuscitated with bag & mask within 1 minute   | Write the total number of babies who were resuscitated with bag & mask within 1 minute |
| Number of babies who were initiated breastfeeding within 1 hour of birth | Write the total number babies who were initiated breastfeeding within 1 hour of birth  |

## 2.2. Perinatal Care Progress Board in KMC Unit

| Indicators                                           | Month: _____ Week: _____ |     |     |     |     |     |     | Weekly compilation<br>(previous week) |
|------------------------------------------------------|--------------------------|-----|-----|-----|-----|-----|-----|---------------------------------------|
|                                                      | Days                     |     |     |     |     |     |     |                                       |
|                                                      | Sun                      | Mon | Tue | Wed | Thu | Fri | Sat |                                       |
| Number of preterm babies admitted to KMC             |                          |     |     |     |     |     |     |                                       |
| Number of LBW babies (<2000g) admitted to KMC        |                          |     |     |     |     |     |     |                                       |
| Number of LBW newborns receiving near continuous KMC |                          |     |     |     |     |     |     |                                       |
| Number of LBW newborns receiving breast milk feeding |                          |     |     |     |     |     |     |                                       |
| Number of babies referred to SNCU/NICU               |                          |     |     |     |     |     |     |                                       |

## Instructions for use

1. This progress board will be placed visibly in the KMC unit.
2. This progress should be maintained on a daily basis by the facilitator or a person assigned by the facilitator. The number in the row for respective indicator should be filled in the morning hours of following day. For example, the facilitator/ health worker will fill the number of respective indicator of Sunday in the morning of Monday.
3. At the end of the week the facilitator should compile the numbers and note in a diary.
4. After completion of the week, the numbers should be erased and the process should be started for the next week.
5. Description of indicators

|                                                      |                                                                                                              |
|------------------------------------------------------|--------------------------------------------------------------------------------------------------------------|
| Number of preterm babies admitted to KMC unit        | Write the total number of preterm babies admitted to KMC unit.                                               |
| Number of LBW babies (<2000g) admitted to KMC        | Write the total number LBW babies with < 2000g weight admitted to KMC unit.                                  |
| Number of LBW newborns receiving near continuous KMC | Write the total number of LBW babies who have received KMC service with permitted intervals as per protocol. |
| Number of LBW newborns receiving breast milk feeding | Write the total number of LBW newborns who is continuously receiving breast milk feeding                     |
| Number of babies referred to NICU/SNCU               | Write the total number babies under KMC who were referred to NICU/SNCU due to complications.                 |

### 2.3. Perinatal Care Progress Board in Sick Newborn Care Unit (NICU/SNCU)

| Indicators                                                     | Month: |     |     |     |     |     | Week: |  | Weekly compilation<br>(previous week) |
|----------------------------------------------------------------|--------|-----|-----|-----|-----|-----|-------|--|---------------------------------------|
|                                                                | Days   |     |     |     |     |     |       |  |                                       |
|                                                                | Sun    | Mon | Tue | Wed | Thu | Fri | Sat   |  |                                       |
| Number of newborns admitted                                    |        |     |     |     |     |     |       |  |                                       |
| Number of inborn babies admitted                               |        |     |     |     |     |     |       |  |                                       |
| Number of babies who had Jaundice                              |        |     |     |     |     |     |       |  |                                       |
| Number of babies who had Respiratory Distress Syndrome (RDS)   |        |     |     |     |     |     |       |  |                                       |
| Number of babies with sepsis who received antibiotics          |        |     |     |     |     |     |       |  |                                       |
| Number of babies who had Hypoxic Ischemic Encephalopathy (HIE) |        |     |     |     |     |     |       |  |                                       |
| Number of babies who received CPAP                             |        |     |     |     |     |     |       |  |                                       |
| Number of babies who received ventilation                      |        |     |     |     |     |     |       |  |                                       |
| Number of first day neonatal deaths                            |        |     |     |     |     |     |       |  |                                       |
| Number of early neonatal deaths (0 to 6 days)                  |        |     |     |     |     |     |       |  |                                       |



## Instructions for use

1. This progress board will be placed visibly in the SNCU/NICU.
2. This progress should be maintained on a daily basis by the facilitator or a person assigned by the facilitator. The number in the row for respective indicator should be filled in the morning hours of following day. For example, the facilitator/ health worker will fill the number of respective indicator of Sunday in the morning of Monday.
3. At the end of the week the facilitator should compile the numbers and note in a diary.
4. After completion of the week, the numbers should be erased and the process should be started for the next week.
5. Description of indicators

|                                                                |                                                                                                      |
|----------------------------------------------------------------|------------------------------------------------------------------------------------------------------|
| Number of newborns admitted                                    | Write the total number of newborns (out-born and inborn) admitted to SNCU/NICU                       |
| Number of inborn babies admitted                               | Write the total number of inborn babies admitted in SNCU/NICU                                        |
| Number of babies who had Jaundice                              | Write the total number of admitted babies who had Jaundice                                           |
| Number of babies who had Respiratory Distress Syndrome (RDS)   | Write the total number of admitted babies who had Respiratory Distress Syndrome                      |
| Number of babies with sepsis who received antibiotics          | Write the total number of babies admitted in SNCU/NICU who received antibiotics                      |
| Number of babies who had Hypoxic Ischemic Encephalopathy (HIE) | Write the total number of babies admitted in SNCU/NICU who had Hypoxic Ischemic Encephalopathy (HIE) |
| Number of babies who received CPAP                             | Write the total number of babies admitted in SNCU/NICU who received CPAP                             |
| Number of babies who received ventilation                      | Write the number of babies who received ventilation support                                          |
| Number of first day neonatal deaths                            | Write the total number of newborns who died during the first 24 hours of birth during a month        |
| Number of early neonatal deaths (0 to 6 days)                  | Write the total number of newborns who died during first and 6 <sup>th</sup> day of life             |

## 2.4. Perinatal Care Progress Board in Progress board in Matron's room

| Indicators                                                             | Month: |        |        |        |        |
|------------------------------------------------------------------------|--------|--------|--------|--------|--------|
|                                                                        | Week 1 | Week 2 | Week 3 | Week 4 | Week 5 |
| Total birth                                                            |        |        |        |        |        |
| Total Still birth                                                      |        |        |        |        |        |
| Number of babies with Low Birth Weight                                 |        |        |        |        |        |
| Number of babies who did not cry at birth                              |        |        |        |        |        |
| Number of babies who are successfully resuscitated with bag & mask     |        |        |        |        |        |
| Number of babies who were resuscitated with bag & mask within 1 minute |        |        |        |        |        |
| Number of babies admitted to KMC                                       |        |        |        |        |        |
| Number of LBW newborns receiving near continuous KMC                   |        |        |        |        |        |
| Number of babies with sepsis who received antibiotics                  |        |        |        |        |        |
| Number of babies who received CPAP                                     |        |        |        |        |        |
| Number of babies who receive ventilation                               |        |        |        |        |        |
| Number of first day neonatal deaths                                    |        |        |        |        |        |
| Number of early neonatal deaths (0 to 6 days)                          |        |        |        |        |        |

## **Instructions for use**

1. This progress board will be placed visibly in the Matron's room.
2. This progress should be maintained on a weekly basis by the facilitator or a person assigned by the facilitator. The number in the row for respective indicator should be filled after the completion of a week. The facilitator/health worker will fill the number of respective indicator of previous week on the morning hours of Sunday.
3. At the end of the month the facilitator should compile the numbers and note in a diary.
4. After completion of the month, the numbers should be erased and the process should be started for the next month.
5. Description of indicators: The numbers for each indicator should be derived from the progress boards being used in Delivery Unit, KMC Unit/Corner and SNCU/NICU.

## 2.5. Progress board in in the Medical Superintendent’s room

| Indicators                                                                            | Month |   |   |   |   |   |   |   |   |    |    |    |
|---------------------------------------------------------------------------------------|-------|---|---|---|---|---|---|---|---|----|----|----|
|                                                                                       | 1     | 2 | 3 | 4 | 5 | 6 | 7 | 8 | 9 | 10 | 11 | 12 |
| Stillbirth Rate                                                                       |       |   |   |   |   |   |   |   |   |    |    |    |
| Proportion of babies who had Low Birth Weight                                         |       |   |   |   |   |   |   |   |   |    |    |    |
| Proportion of babies who did not cry at birth                                         |       |   |   |   |   |   |   |   |   |    |    |    |
| Proportion of non-crying babies who are successfully resuscitated with bag & mask     |       |   |   |   |   |   |   |   |   |    |    |    |
| Proportion of non-crying babies who were resuscitated with bag & mask within 1 minute |       |   |   |   |   |   |   |   |   |    |    |    |
| Number of babies admitted to KMC                                                      |       |   |   |   |   |   |   |   |   |    |    |    |
| Proportion of LBW newborns receiving near continuous KMC                              |       |   |   |   |   |   |   |   |   |    |    |    |
| Proportion of babies with sepsis who received antibiotics                             |       |   |   |   |   |   |   |   |   |    |    |    |
| First day neonatal mortality rate                                                     |       |   |   |   |   |   |   |   |   |    |    |    |
| Early neonatal (0 to 6 days) mortality rate                                           |       |   |   |   |   |   |   |   |   |    |    |    |

## Instructions for use

1. This progress board will be placed visibly in the room of Medical Superintendent.
2. This progress should be maintained on a monthly basis by the medical record officer/medical recorder. The number in the row for respective indicator should be filled after the completion of each month.
3. At the end of the month the facilitator should compile the numbers and note in a diary.
4. After completion of the month, the numbers should be erased and the process should be started for the next month.
5. Description of indicators

|                                                                                   |                                                                                                                                                                                                                                                       |
|-----------------------------------------------------------------------------------|-------------------------------------------------------------------------------------------------------------------------------------------------------------------------------------------------------------------------------------------------------|
| Stillbirth Rate                                                                   | <p><b>Numerator:</b> Total number of still births in a month</p> <p><b>Denominator:</b> Total births during the same month</p> <p><b>Multiplier:</b> 1000</p>                                                                                         |
| Proportion of babies who had Low Birth Weight                                     | <p><b>Numerator:</b> Total number babies with low birth weight (&lt;2500 g) in a month</p> <p><b>Denominator:</b> Total live births during the same month</p> <p><b>Multiplier:</b> 100</p>                                                           |
| Proportion of babies who did not cry at birth                                     | <p><b>Numerator:</b> Total number of babies who did not cry at birth in a month</p> <p><b>Denominator:</b> Total births during the same month</p> <p><b>Multiplier:</b> 100</p>                                                                       |
| Proportion of non-crying babies who are successfully resuscitated with bag & mask | <p><b>Numerator:</b> Total number of non-crying babies who are successfully resuscitated with bag &amp; mask</p> <p><b>Denominator:</b> Total number of non-crying babies who were resuscitated with bag &amp; mask</p> <p><b>Multiplier:</b> 100</p> |

|                                                                                       |                                                                                                                                                                                                                               |
|---------------------------------------------------------------------------------------|-------------------------------------------------------------------------------------------------------------------------------------------------------------------------------------------------------------------------------|
| Proportion of non-crying babies who were resuscitated with bag & mask within 1 minute | <p><b>Numerator:</b> Total number of non-crying babies who were resuscitated with bag &amp; mask within 1 minute</p> <p><b>Denominator:</b> Total number of babies who did not cry at birth</p> <p><b>Multiplier:</b> 100</p> |
| Number of babies admitted to KMC                                                      | Write the total number of babies admitted to KMC unit during a month                                                                                                                                                          |
| Proportion of LBW newborns receiving near continuous KMC                              | <p><b>Numerator:</b> Total number of babies receiving near continuous KMC during a month</p> <p><b>Denominator:</b> Total number of LBW babies</p> <p><b>Multiplier:</b> 100</p>                                              |
| Proportion of babies with sepsis who received antibiotics                             | <p><b>Numerator:</b> Total number of babies with sepsis who received antibiotics</p> <p><b>Denominator:</b> Total number of babies with sepsis admitted to SNCU/NICU</p> <p><b>Multiplier:</b> 100</p>                        |
| First day neonatal mortality rate                                                     | <p><b>Numerator:</b> Total number of newborns who died during the first 24 hours of birth during a month</p> <p><b>Denominator:</b> Total live births</p> <p><b>Multiplier:</b> 1000</p>                                      |
| Early neonatal (0 to 6 days) mortality rate                                           | <p><b>Numerator:</b> The total number of newborns who died during first and sixth day of birth during a month.</p> <p><b>Denominator:</b> Total live births during a month</p> <p><b>Multiplier:</b> 1000</p>                 |

## Nepal Perinatal Quality Improvement Project

### Summary of Checklist for Perinatal Care in Hospital

| Name of Checklist                                          | Type of checklist | Objective                                                                               | How                                                                                              | Who           | Where                        | when                                                  | How is it going to be used |
|------------------------------------------------------------|-------------------|-----------------------------------------------------------------------------------------|--------------------------------------------------------------------------------------------------|---------------|------------------------------|-------------------------------------------------------|----------------------------|
| <b>Bag-and-mask skill check</b>                            | Simulated         | To improve the simulated skill on neonatal resuscitation on a mannequin                 | Bag-and-mask skill check in a mannequin (self and peer)<br>Recording of the steps followed       | Health worker | Labor room or hand over room | At the beginning of taking handover every day on duty |                            |
| <b>Preparation for resuscitation before every delivery</b> | Clinical          | To improve the clinical performance on preparation for resuscitation before every birth | Preparation for the materials for resuscitation before each delivery in the resuscitation corner | Health worker | Resuscitation corner         | During labor, just before delivery                    |                            |
| <b>Immediate routine newborn care</b>                      | Clinical          | To improve the clinical performance on immediate routine newborn care                   | Immediate routine newborn care                                                                   | Health worker | Labor room                   | Immediately after delivery                            |                            |
| <b>Care of the babies who were resuscitated</b>            | Clinical          | To improve the clinical performance on resuscitation                                    | Neonatal resuscitation within 1 minute                                                           | Health worker | Labor room                   | Immediately after delivery                            |                            |
| <b>Care of the babies who are born small</b>               | Clinical          | To improve the clinical performance on care of small babies                             | KMC for babies who are born small                                                                | Health worker | KMC corner or Unit           | After provision of KMC counselling                    |                            |
| <b>Management of the babies who have neonatal sepsis</b>   | Clinical          | To improve the clinical performance on management of neonatal sepsis                    | Management of neonatal sepsis                                                                    | Health worker | SNCU/NICU                    | During or after management of neonatal sepsis         |                            |

### 3.1. Self-assessment checklist on Bag-and-Mask skill check on the mannequin

Instruction - On a daily basis, before taking the hand over for the duty, the health worker need to do a bag-and-mask skill check on the mannequin. After the bag-and-mask skill check the health workers need to fill in the self-assessment checklist.

After filling up the self-assessment checklist, the health workers need to tear the filled in paper and put/clip it on a separate index form or area.

Name of the hospital \_\_\_\_\_

Name of health worker \_\_\_\_\_

Date (dd/mm/yyyy) \_\_\_\_\_ Time (hh:mm) \_\_\_\_\_

Scoring keys: Y=Yes, N=No, NA= Not applicable

Score: All Yes =1, Any No =0

| Performance area                                                            | Checklist                                                                 | Y/N | NA |
|-----------------------------------------------------------------------------|---------------------------------------------------------------------------|-----|----|
| 1. Check equipment and select correct mask                                  | Test the function of Bag and Mask                                         |     |    |
|                                                                             | Make sure mask fits the mannequin's face                                  |     |    |
| 2. Apply the mask to make to a firm seal in the mouth and nose of mannequin | Extend the head, place the mask on the chin, then over the mouth and nose |     |    |
|                                                                             | A firm seal permits chest movement when the bag is squeezed               |     |    |
| 3. Ventilate 40 breaths per minute                                          | The rate should not be less than 30 or more than 50 breaths per minute    |     |    |
| 4. Look for chest movement                                                  | Check that for every ventilation breath produces chest movement           |     |    |

Signature of the health worker.....



### 3.2. Self-assessment checklist for preparation for resuscitation before every delivery

Instruction - For every birth, the health workers need to prepare for resuscitation. After the delivery of each baby, the health worker need to fill in the self-assessment checklist.

After filling up the self-assessment checklist, the health workers need to tear the filled in paper and put/clip it on a separate index form or area.

Name of the hospital \_\_\_\_\_

Name of health worker \_\_\_\_\_

Date (dd/mm/yyyy) \_\_\_\_\_ Time (hh:mm) \_\_\_\_\_

Scoring keys: Y=Yes, N=No, NA= Not applicable

Score: All Yes =1, Any No =0

| Steps                                                                                                                                    | Y/N | NA |
|------------------------------------------------------------------------------------------------------------------------------------------|-----|----|
| 1. Identification of helper and review of emergency plan with the helper                                                                 |     |    |
| 2. Prepared the delivery room for delivery                                                                                               |     |    |
| 3. Washed hands                                                                                                                          |     |    |
| 4. Prepared the area for ventilation (resuscitation corner)                                                                              |     |    |
| 5. Assembled all supplies and equipment (Gloves, clothes, head covering, scissors, clamps, suction device, Bag-Mask, stethoscope, timer) |     |    |
| 6. Checked the bag and mask for ventilation                                                                                              |     |    |

Signature of the health worker.....

### 3.3. Self-assessment checklist for babies requiring routine immediate newborn care

Instruction- For every birth, if the baby is breathing well, routine immediate newborn care needs to be provided. After the delivery of each baby, the health worker need to fill in the self-assessment checklist.

After filling up the self-assessment checklist, the health workers need to tear the filled in paper and put/clip it on a separate index form or area.

Name of the hospital \_\_\_\_\_

Name of health worker \_\_\_\_\_

Date (dd/mm/yyyy) \_\_\_\_\_

Time (hh:mm) \_\_\_\_\_

Scoring keys: Y=Yes, N=No, NA= Not applicable

Score: All Yes =1, Any No =0

| Steps                                                                                              | Y/N | NA |
|----------------------------------------------------------------------------------------------------|-----|----|
| 1. Babies dried thoroughly                                                                         |     |    |
| 2. Checked whether the baby is crying or not                                                       |     |    |
| 3. Keep the baby warm (Cover head and body, Position skin to skin with the neck slightly extended) |     |    |
| 4. Breathing of the baby checked                                                                   |     |    |
| 5. Umbilical cord clamped or tied and cut the cord (within 1 – 3 min after birth)                  |     |    |
| 6. Reposition baby on mother’s chest to encourage breastfeeding within 1 hour of birth             |     |    |
| 7. Assess any danger signs and complete the birth record                                           |     |    |

Signature of the health worker.....

### 3.4. Self-assessment checklist for babies requiring ventilation

Instruction - For babies who required resuscitation, the health worker need to fill in the self-assessment checklist. After filling up the self-assessment checklist, the health workers need to tear the filled in paper and put/clip it on a separate index form or area.

Name of the hospital \_\_\_\_\_

Name of health worker \_\_\_\_\_

Date (dd/mm/yyyy) \_\_\_\_\_ Time (hh:mm) \_\_\_\_\_

Scoring keys: Y=Yes, N=No, NA= Not applicable      Score: All Yes =1, Any No =0

| Steps                                                                                                                | Y/N | NA |
|----------------------------------------------------------------------------------------------------------------------|-----|----|
| 1. Babies dried thoroughly                                                                                           |     |    |
| 2. Checked whether the baby is crying or not                                                                         |     |    |
| 3. If baby is not crying, baby kept warm and airway cleared if needed                                                |     |    |
| 4. Breathing of the baby stimulated (rubbing the back)                                                               |     |    |
| 5. Breathing of the baby checked                                                                                     |     |    |
| 6. If the baby is not breathing, Umbilical cord clamped or tied and cut the cord                                     |     |    |
| 7. Moved baby to ventilation area                                                                                    |     |    |
| 8. Stand towards the baby's head and correct mask selected                                                           |     |    |
| 9. Ventilation initiated within 1 minute after delivery                                                              |     |    |
| 10. Ventilation at 40 breaths per minute                                                                             |     |    |
| 11. Recognized chest moving/not moving                                                                               |     |    |
| 12. Recognized breathing                                                                                             |     |    |
| 13. If baby is not breathing well, Call for help                                                                     |     |    |
| 14. Continued ventilation                                                                                            |     |    |
| 15. Recognized breathing and assessed heart rate                                                                     |     |    |
| 16. If heart Rate less than 100/minute or normal with no breathing, continue ventilation and refer for advanced care |     |    |
| 17. If breathing well and Heart rate normal                                                                          |     |    |
| 18. Stopped ventilation, monitored baby                                                                              |     |    |
| 19. Assessed malformation                                                                                            |     |    |

Signature of the health worker.....

### 3.5. Self-assessment checklist for babies who were provided Kangaroo Mother Care (KMC)

Instruction - For babies who require KMC, the health worker is requested to fill in the self-assessment checklist. After filling up the self-assessment checklist, the health workers need to tear the filled in paper and put/clip it on a separate index form or area.

Name of the hospital \_\_\_\_\_

Name of health worker \_\_\_\_\_

Date (dd/mm/yy) \_\_\_\_\_

Time (hh:mm) \_\_\_\_\_

Scoring keys: Y=Yes, N=No, NA= Not applicable

Score: All Yes =1, Any No =0

| Steps                                                                                                                           | Y/N | NA |
|---------------------------------------------------------------------------------------------------------------------------------|-----|----|
| 1. Mother or care-giver counselled on benefits of KMC                                                                           |     |    |
| 2. privacy for the client ensured                                                                                               |     |    |
| 3. Hand washing done before handling the newborn                                                                                |     |    |
| 4. Baby dressed in cap, socks, nappy and front open clothes/shirt.                                                              |     |    |
| 5. Baby placed in between mother's breasts in upright position                                                                  |     |    |
| 6. Baby's head turned to one side in slightly extended position                                                                 |     |    |
| 7. Hips are flexed and abducted and arms are also flexed (frog position)                                                        |     |    |
| 8. Baby's abdomen is at the level of the mother's epigastrium                                                                   |     |    |
| 9. Baby is supported underneath gluts by a sling/binder                                                                         |     |    |
| 10. Position of head and neck (alternate neck position), airway, breathing, color and temperature monitored                     |     |    |
| 11. Encourage mother/caregiver to sit in a comfortable position and counsel on the need to provide KMC for 24 hours if possible |     |    |

Signature of the health worker.....

### 3.6. Self-assessment checklist for babies who were managed for neonatal infection

Instruction- For babies who are managed of neonatal infection, the health worker is requested to fill in this self-assessment checklist. After filling up the self-assessment checklist, the health workers need to tear the filled in paper and put/clip it on a separate index form or area.

**Name of the hospital**

**Name of health worker**

Date (dd/mm/yyyy) \_\_\_\_\_

Time (hh:mm) \_\_\_\_\_

**Scoring keys: Y=Yes, N=No, NA= Not applicable**

**Score: All Yes =1, Any No =0**

| Steps                                                                                                                                                                                      | Y/N | NA |
|--------------------------------------------------------------------------------------------------------------------------------------------------------------------------------------------|-----|----|
| 1. Washed hands before handling newborn                                                                                                                                                    |     |    |
| 2. Checked the environment and provide warmth, ensured a consistent normal temperature for the baby.                                                                                       |     |    |
| 3. Started intravenous line                                                                                                                                                                |     |    |
| 4. Infuse normal saline 10ml/kg over 30 minutes if CRT>3 seconds, repeat the same 1-2 times, if perfusion continues to be poor                                                             |     |    |
| 5. Infuse 10% dextrose 2 ml/kg stat                                                                                                                                                        |     |    |
| 6. Injected Vitamin K1 mg IM (if birthweight ≥ 1000 gm) and 0.5 mg if birthweight <1000 gm                                                                                                 |     |    |
| 7. Started oxygen by hood or mask, if cyanosed or grunting                                                                                                                                 |     |    |
| 8. Provided gentle physical stimulation, if apnoeic. Provided bag and mask ventilation with oxygen if breathing is inadequate                                                              |     |    |
| 9. Avoid enteral feed if hemodynamically compromised, give maintenance IV fluids                                                                                                           |     |    |
| 10. Considered use of dopamine if perfusion is persistently poor                                                                                                                           |     |    |
| 11. Counselling mother and family infection prevention practices <ul style="list-style-type: none"> <li>a. Hand washing</li> <li>b. Minimum visitors</li> <li>c. Clean clothing</li> </ul> |     |    |
| 12. Monitored the Clinical Signs of bacterial infection throughout the process and responded accordingly.                                                                                  |     |    |

Signature of the health worker.....

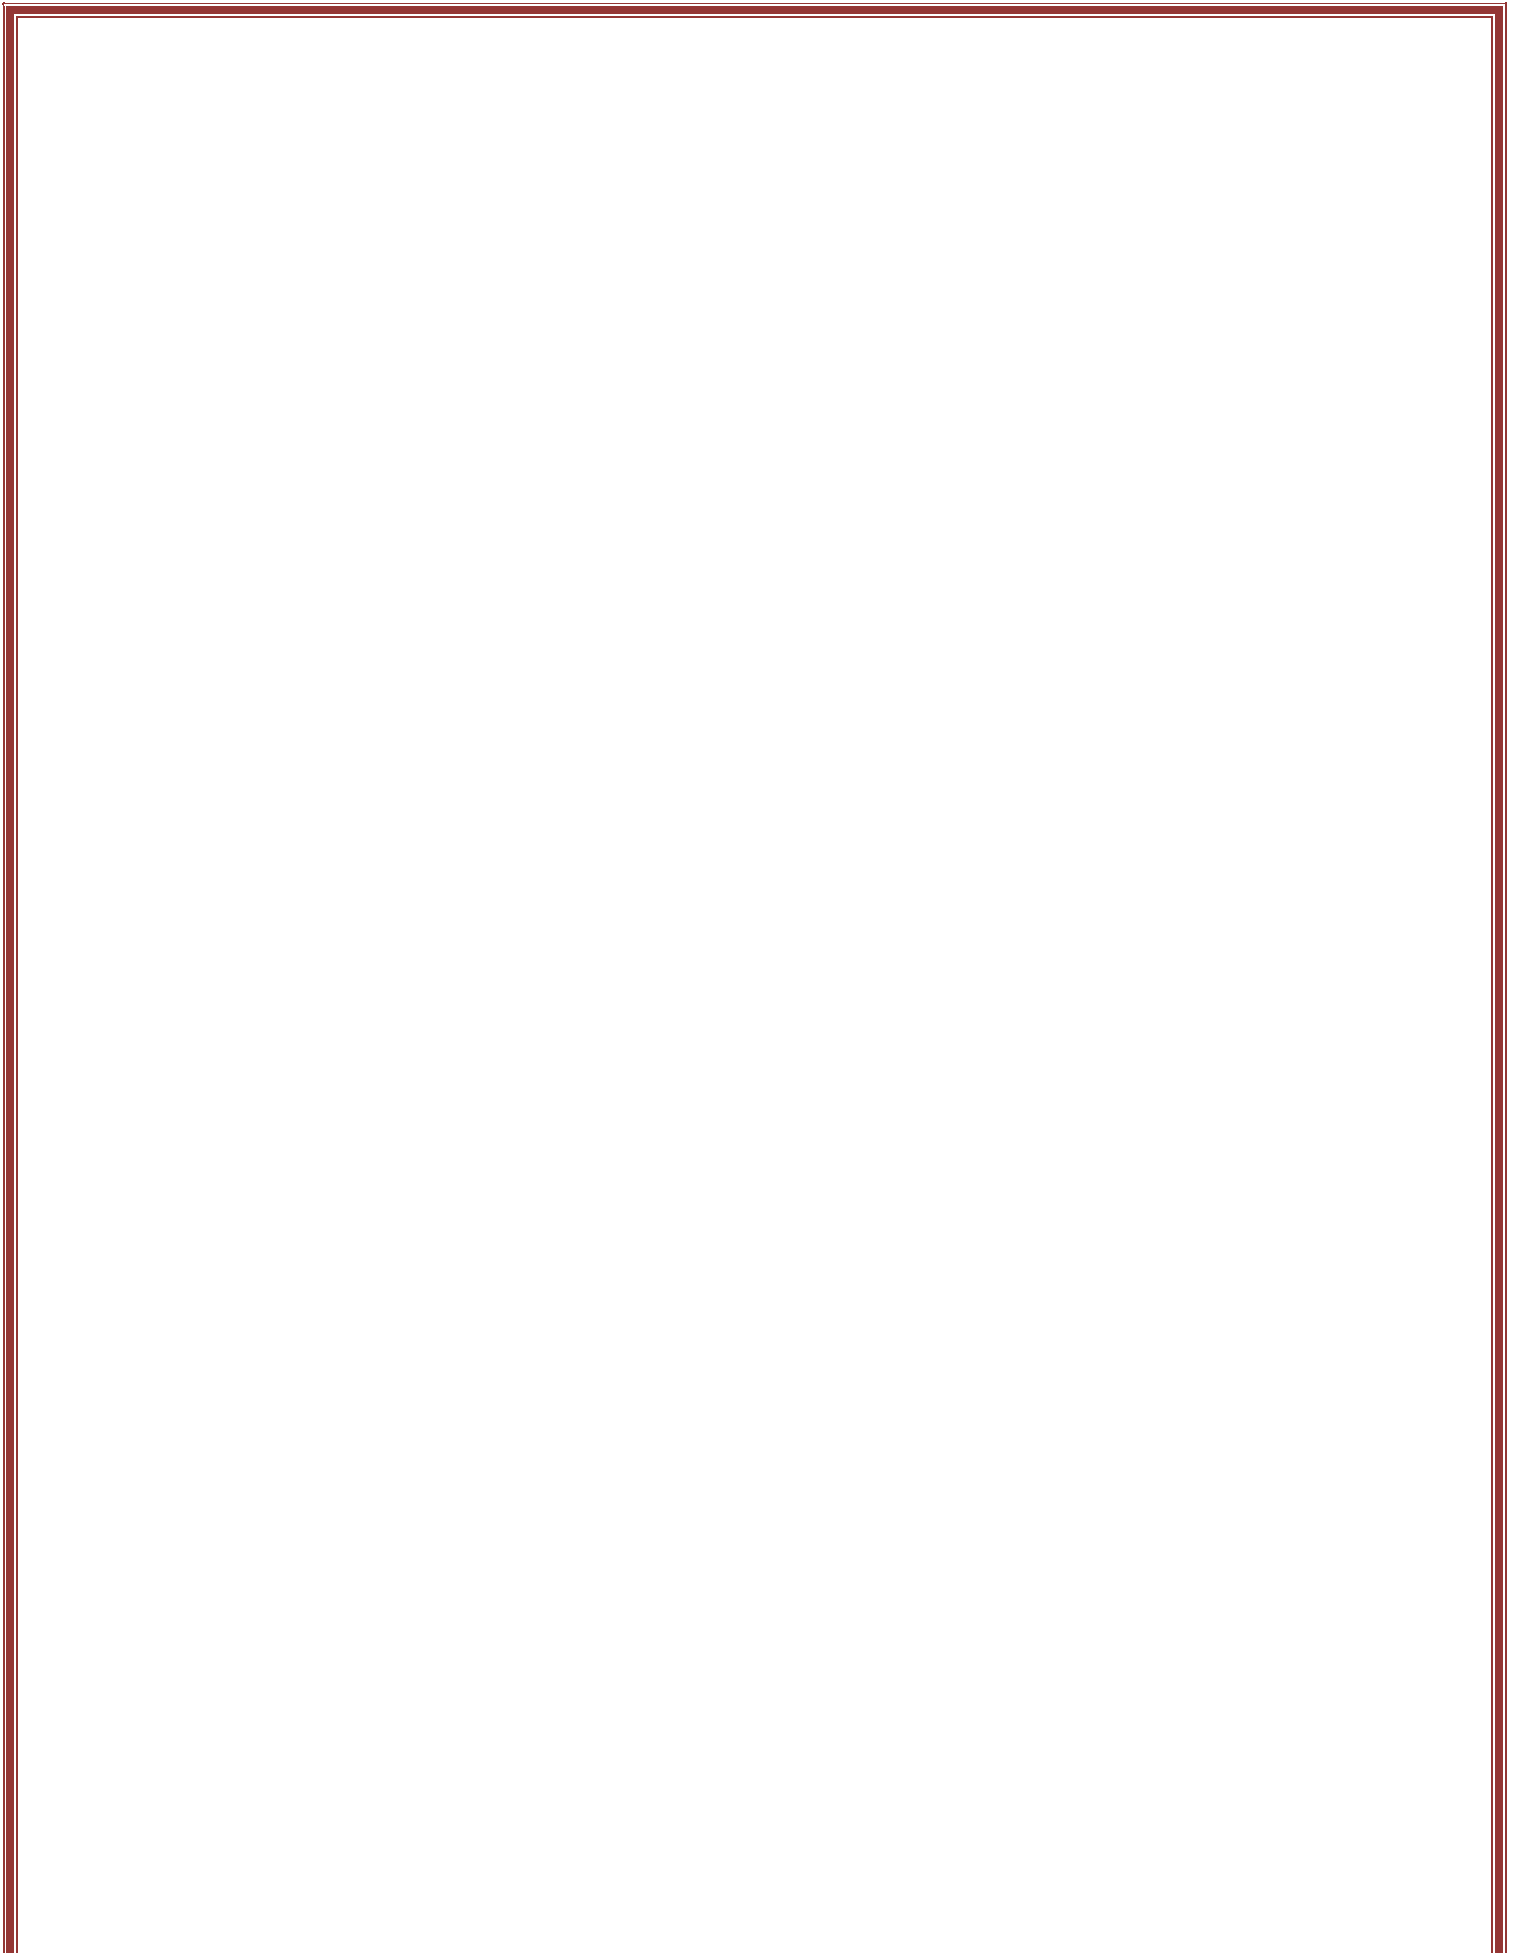

Supplement: MOESM2 [file 17319504]
